# Supplementary material for: Unveiling the Performance-Oriented Brains: Striving to Prove Versus Striving to Outperform
Source: Research Square preprint supplement (doi:10.21203/rs.3.rs-6845480/v1), 2025-07-03
Supplement: Supplementary file 1 [file 379ef6a2956ca15f6f5cfd0d.docx]

**Supplementary Materials**

**Table S1.**

| Variable | Items | Source |
| --- | --- | --- |
| Anxiety | 1. During the task, I thought of the consequences of failing.  2. I had an uneasy, upset feeling during the task. | Duncan & McKeachie (2005) |
| Interest | 1. The task was interesting.  2. I enjoyed the task. | Hulleman et al. (2010) |
| Task-Irrelevant thought | 1. I thought about things other than the task.  2. I had a hard time concentrating on the task. | Linnenbrink et al. (1999) |
| Shame | 1. I feel humiliated.  2. I feel disgraced. | Izard (1971) |
| Anger | 1. I feel angry.  2. I feel annoyed. | Izard (1971) |
| Self-worth | 1. On the whole, I am satisfied with myself.  2. I feel that I have a number of good qualities.  3. I feel that I’m a person of worth. | Rosenberg (1965) |
| Failure  attribution | Think about times when you failed during this task. What do you think is the reason for the failure? | Nicholls (1979) |
| Ability | I lacked ability. |
| Effort | I did not try hard. |
| Luck | I was unlucky. |
| Difficulty | The task was hard. |

*Full List of Survey Items*

*Note*. All items were rated on a 4-point Likert scale, except for failure attribution which was rated on a 7-point Likert scale.

**Table S2.**

*Results of Conjunction Analysis for the Go/No-go Task*

| Brain regions | R/L | Peak MNI coordinates | | | *t*-value | k |
| --- | --- | --- | --- | --- | --- | --- |
| x | y | z |
| *No-go correct > Go (successful inhibition)* | | | | | | |
| Inferior parietal lobule | R | 48 | -40 | 52 | 7.20 | 3523 |
| Striatum | R | 18 | 12 | 0 | 5.37 | 597 |
| *No-go incorrect > Go (unsuccessful inhibition)* | | | | | | |
| Anterior insula | R | 36 | 14 | -6 | 9.89 | 1577 |
| Inferior parietal lobule | R | 62 | -38 | 44 | 9.02 | 1033 |
| Anterior insula | L | -40 | 12 | -4 | 8.73 | 1432 |
| Dorsal anterior cingulate cortex | R | -4 | 26 | 26 | 7.69 | 2397 |

*Note*. Results represent the overlapping brain activations between the ability-goal and normative-goal groups during the secondary task (Run 4). To control for multiple comparisons, a cluster-level FWE correction was applied at *p* < .05, with a cluster-defining threshold of *p* < .001 (uncorrected). No group differences were observed during this task.
